# Supplementary material for: Citrus Honey Ameliorates Liver Disease and Restores Gut Microbiota in Alcohol–Feeding Mice
Source: MDPI journal article supplement (doi:10.3390/nu15051078), 2023-02-21

## Supplementary Materials:

**Table S1.** Linear gradient elution program.

| Time(min)          | 0  | 2  | 5  | 10 | 12 | 14 | 15  | 17  | 17.5 | 21 |
|--------------------|----|----|----|----|----|----|-----|-----|------|----|
| Mobile phase A (%) | 95 | 90 | 60 | 30 | 20 | 20 | 0   | 0   | 95   | 95 |
| Mobile phase B (%) | 5  | 10 | 40 | 70 | 80 | 80 | 100 | 100 | 5    | 5  |

**Table S2.** Retention time, mass-to-charge ratio, standard curve, and R<sup>2</sup> of SCFAs standards.

| SCFAs          | RT (min) | mass-to-charge ratio ( <i>m/z</i> ) | Regression equation       | R <sup>2</sup> |
|----------------|----------|-------------------------------------|---------------------------|----------------|
| Acetic acid    | 5.27     | 117                                 | $y = 3.7000x + 838004.87$ | 1.0000         |
| Propionic acid | 7.19     | 131                                 | $y = 1.3721x + 17843$     | 0.9976         |
| Butyric acid   | 8.94     | 145                                 | $y = 1.6716x + 15802$     | 0.9991         |
| Valeric acid   | 11.07    | 159                                 | $y = 1.6041x + 4472.6$    | 0.9956         |

**Table S3.** Contents of 26 compounds in CH (µg/100 g honey)

| Compounds                    | Rt<br>min | Concentration (µg/100 g) |        |        |        |        | Regression equation        | R <sup>2</sup> |
|------------------------------|-----------|--------------------------|--------|--------|--------|--------|----------------------------|----------------|
|                              |           | M1                       | M2     | M3     | M4     | M5     |                            |                |
| 4-Hydroxyquinoline           | 2.79      | nd                       | 9.84   | 7.30   | 8.16   | 11.25  | $y = 7044.30x + 10426.00$  | 0.9975         |
| Salicylic acid               | 3.26      | 15.59                    | 14.27  | 11.92  | 12.99  | 13.99  | $y = 148.13x - 527.70$     | 0.9987         |
| Vanillic acid                | 3.66      | 2.79                     | 2.19   | 1.89   | nd     | 2.10   | $y = 31.90x + 77.56$       | 0.9999         |
| Rutin                        | 4.09      | 81.66                    | 73.32  | 72.78  | 62.88  | 75.39  | $y = 2,074.22x - 4,781.76$ | 0.9999         |
| Trans-4-hydroxycinnamic acid | 4.28      | nd                       | 9.84   | 7.30   | 8.16   | 11.25  | $y = 27.28x + 155.28$      | 0.9999         |
| Ellagic acid                 | 4.38      | 1.65                     | 1.08   | 0.86   | nd     | 1.09   | $y = 33.06x + 114.51$      | 0.9998         |
| Sinapinic acid               | 4.58      | 5.79                     | 5.55   | nd     | 2.47   | 1.80   | $y = 35.75x + 787.18$      | 0.9948         |
| Luteolin                     | 4.60      | 5.76                     | 8.41   | 7.08   | 5.98   | 9.29   | $y = 21.97x + 285.40$      | 0.9990         |
| Trans-ferulic acid           | 4.61      | 0.61                     | 0.58   | 0.54   | 0.56   | 0.58   | $y = 456.32x + 6585.80$    | 0.9970         |
| Hesperidin                   | 4.69      | 11.22                    | 11.26  | 9.37   | 10.35  | 10.96  | $y = 167.87x + 2436.60$    | 0.9998         |
| Naringin                     | 4.69      | 0.37                     | 0.35   | 0.34   | 0.35   | 0.36   | $y = 1726.70x + 26406.00$  | 0.9916         |
| 4-hydroxybenzoic acid        | 4.83      | 0.59                     | 0.65   | 0.41   | 0.50   | 0.56   | $y = 429.43x + 5119.90$    | 0.9958         |
| 3,4-Dimethoxycinnamic acid   | 5.27      | 111.27                   | 106.48 | 89.60  | 94.54  | 106.49 | $y = 76.91x + 1534.80$     | 0.9962         |
| 3,4-Dihydroxybenzoic acid    | 5.27      | 2.58                     | 2.23   | 2.82   | 2.79   | 1.95   | $y = 181.24x - 3752.40$    | 0.9949         |
| Methyl syringate             | 5.33      | 4.53                     | 4.17   | 3.13   | 4.08   | 4.68   | $y = 218.77x + 695.69$     | 0.9991         |
| Fisetin                      | 5.48      | 0.48                     | nd     | 0.39   | 0.39   | 0.37   | $y = 2141.10x - 4015.30$   | 0.9990         |
| Absciscic acid               | 5.50      | 276.20                   | 273.72 | 235.56 | 253.07 | 265.25 | $y = 470.01x + 5429.20$    | 0.9907         |
| Quercetin                    | 5.58      | 1.78                     | 1.72   | 1.66   | 1.78   | 1.45   | $y = 766.94x - 3741.7$     | 0.9998         |
| Trans-cinnamic acid          | 5.67      | 1.30                     | 4.20   | 1.10   | 2.25   | 1.23   | $y = 23.04x + 312.50$      | 0.9962         |
| Naringenin                   | 5.95      | 0.03                     | 0.03   | 0.02   | 0.03   | 0.03   | $y = 1954.90x + 357.64$    | 0.9997         |
| Apigenin                     | 6.03      | 0.58                     | nd     | nd     | 2.47   | 2.47   | $y = 2121.90x - 5531.50$   | 0.9993         |
| Kaempferol                   | 6.15      | 3.00                     | 2.87   | 2.96   | 3.02   | 2.90   | $y = 1896.40x - 12028.00$  | 0.9993         |
| Hesperetin                   | 6.17      | 3.10                     | 2.79   | 1.78   | 2.34   | 3.02   | $y = 2328.60x - 1106.10$   | 0.9999         |
| Kaempferide                  | 6.29      | nd                       | nd     | nd     | nd     | 8.73   | $y = 15.84x - 4.91$        | 0.9992         |
| Daidzein                     | 7.42      | 0.12                     | 0.11   | 0.11   | 0.11   | 0.12   | $y = 3512.10x - 8727.90$   | 0.9992         |

| Compounds | Rt<br>min | Concentration (µg/100 g) |      |      |      |      | Regression equation    | R <sup>2</sup> |
|-----------|-----------|--------------------------|------|------|------|------|------------------------|----------------|
|           |           | M1                       | M2   | M3   | M4   | M5   |                        |                |
| Chrysin   | 7.70      | 7.51                     | 7.56 | 7.54 | 7.56 | 7.51 | y = 993.78x - 24138.00 | 0.996<br>6     |

nd means not detected

**Table S4** Histopathological Assessment Grading

| Parameter        | PF | AF | PC | LH | MH | HH | FG |
|------------------|----|----|----|----|----|----|----|
| Steatosis        | 0  | 4  | 1  | 1  | 2  | 2  | 4  |
| Inflammation     | 0  | 2  | 1  | 1  | 2  | 1  | 2  |
| Hepatic fibrosis | 0  | 0  | 0  | 0  | 0  | 0  | 1  |
| Total            | 0  | 6  | 2  | 2  | 4  | 3  | 7  |

  

| Hepatic disease  |                                            | Scores |
|------------------|--------------------------------------------|--------|
| Steatosis        | Nonsteatosis                               | 0      |
|                  | Range of steatosis<30%                     | 1 +    |
|                  | Range of steatosis>30%                     | 2 +    |
|                  | Range of steatosis>50%                     | 3 +    |
|                  | Range of steatosis>75%                     | 4 +    |
| Inflammation     | No inflammation present                    | 0      |
|                  | Ballooning degeneration of liver cells<30% | 1 +    |
|                  | Ballooning degeneration of liver cells>30% | 2 +    |
|                  | Ballooning degeneration of liver cells>50% | 3 +    |
|                  | Ballooning degeneration of liver cells>75% | 4 +    |
| Hepatic fibrosis | Non-fibrosis                               | 0      |
|                  | Hepatic fibrosis<30%                       | 1 +    |
|                  | Hepatic fibrosis>30%                       | 2 +    |
|                  | Hepatic fibrosis>50%                       | 3 +    |
|                  | Hepatic fibrosis>75%                       | 4 +    |

**Table S5.** The composition table of dominant species in each group of mouse intestinal flora

phylum levels.

| Phylum                               | PF     | AF     | PC     | LH     | MH     | HH     | FG     |
|--------------------------------------|--------|--------|--------|--------|--------|--------|--------|
| Bacteroidota                         | 0.69%  | 48.39% | 64.56% | 64.52% | 53.89% | 57.71% | 48.60% |
| Firmicutes                           | 23.50% | 39.96% | 26.24% | 25.64% | 36.27% | 32.13% | 35.85% |
| Campilobacterota                     | 2.06%  | 1.97%  | 3.00%  | 3.65%  | 3.94%  | 3.64%  | 8.60%  |
| Actinobacteriota                     | 2.18%  | 4.19%  | 2.49%  | 0.44%  | 2.42%  | 2.62%  | 1.52%  |
| Verrucomicrobiota                    | 1.52%  | 2.90%  | 2.46%  | 1.16%  | 0.18%  | 1.79%  | 3.36%  |
| Proteobacteria                       | 0.33%  | 1.31%  | 0.30%  | 3.91%  | 2.70%  | 1.61%  | 0.63%  |
| Desulfobacterota                     | 0.71%  | 0.80%  | 0.74%  | 0.29%  | 0.31%  | 0.32%  | 1.12%  |
| Firmicutes/Bacteroidetes ratio (F/B) | 33.88% | 82.57% | 40.64% | 39.74% | 67.30% | 55.67% | 73.77% |

**Figure S1.** The base peak intensity chromatogram (BPI) of CH by UPLC-Q-TOF-MS

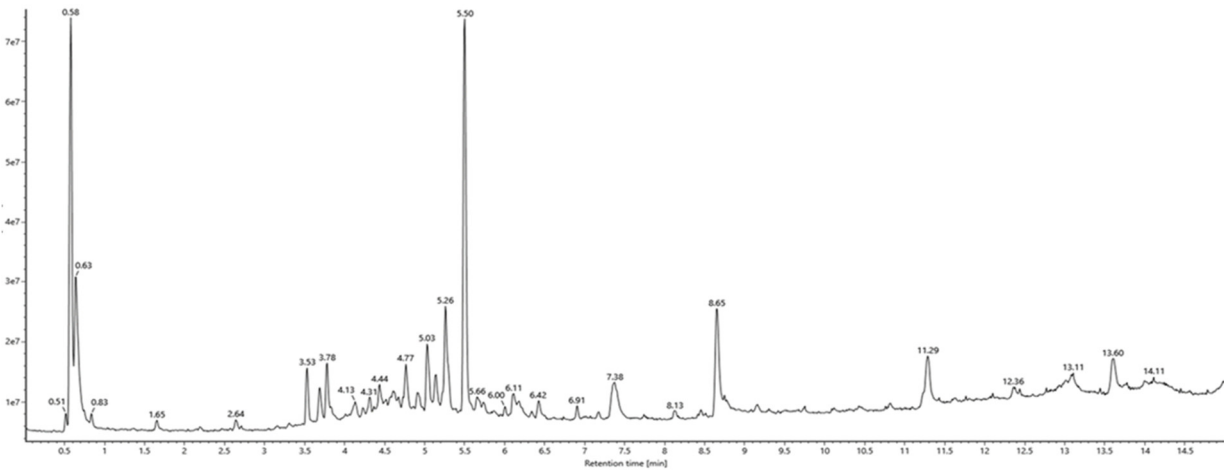

**Figure S2.** (A) Rarefaction analysis and (B) Shannon index of gut microbiota from seven groups of mice.

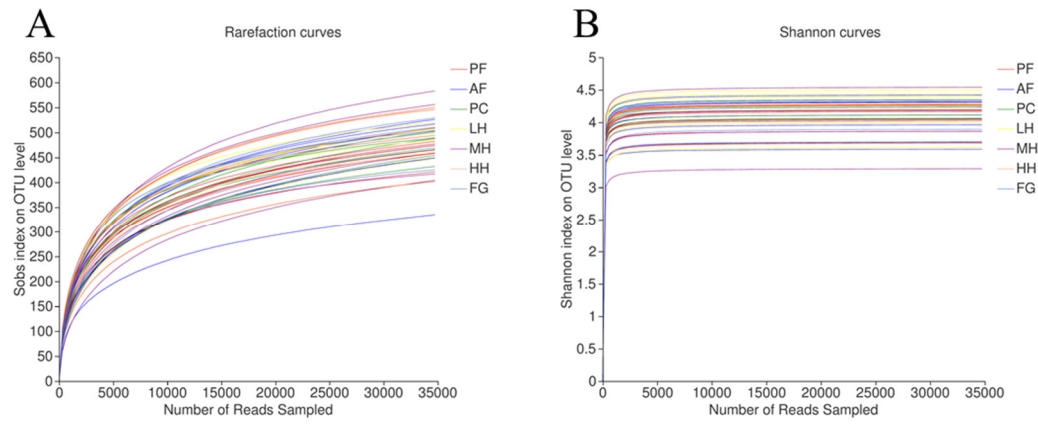

**Figure S3.** Comparison of the differences of gut microbiota diversity index among seven groups of mice. Chao index (a), Ace index (b), Shannon index (c), and Simpson index(d).

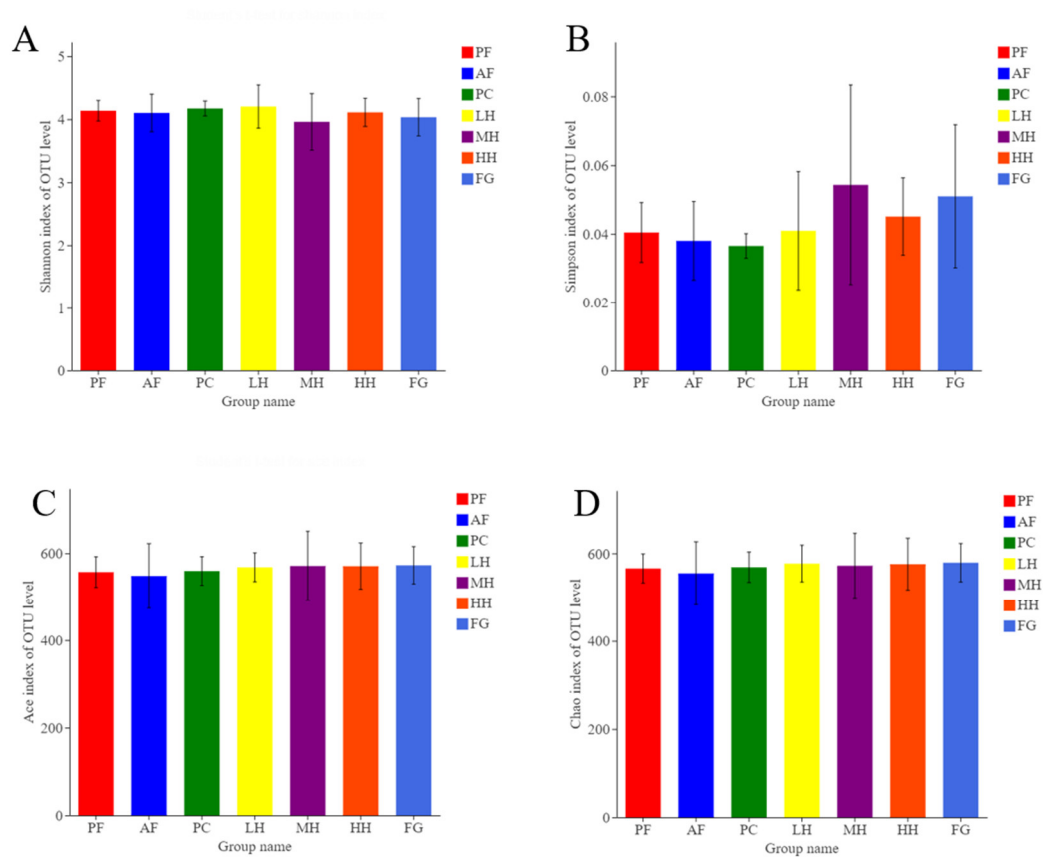

Supplement: s1 [file s1]
